# Supplementary material
Source: PubMed Central journal article supplement (PMC4263658)
Supplement: 131494suppa1.pdf [file 131494suppa1.pdf]

## **Appendix E1**

### **Members of the Action to Control Cardiovascular Risk in Diabetes (ACCORD), Memory in Diabetes (MIND) Study Group Clinical Center Networks and Clinical Sites**

#### **Coordinating Center**

Wake Forest University School of Medicine, Winston-Salem, NC: M. Miller, L. Coker, L. Lovato, J. Hepler, D. Felton, L. Andrews, S. Mayer, C. Carter, N. Woolard

#### **MR Reading Center**

Department of Radiology, University of Pennsylvania, Hospital of the University of Pennsylvania, Philadelphia, Pa: L. Desiderio, E. Melhem, D. Koka, E. Parmpi, H. Battapady, G. Erus

#### **Minnesota-Iowa Clinical Center Networks**

Berman Center for Outcomes & Clinical Research, Minneapolis, Minn: R.H. Grimm, Jr, B.R. Kirpach, M.M. Bartkoske, C.M. Boyce, N. Druckman, A.M. Gillett, J.A. Levin, G.J. Livingston, K.L. Margolis, C. Truwit

MIND: G.J. Livingston, K.L. Margolis

MIND MR imaging: C. Truwit, G.J. Livingston

#### **Minnesota-Iowa Clinical Sites**

Hennepin ACCORD Clinic, Minneapolis, Minn: S. Kempainen, M. Madden, K. Hall, K.Wood.

International Diabetes Center, Minneapolis, Minn: R. Bergenstal, R. Cuddihy, B. Davick, S. List, D. Whipple, C. Ashanti, D. Kendall

University of Minnesota, Minneapolis, Minn: E.R. Seaquist, M.V. Mech, L.E. Benedict, D.J. Demmon, A.F. Kumar, S.M. Martinson, S.A. Miller, C. Pease, J.P. Rao, J.B. Redmon, J.E. Swanson, J.K. Wimmer, Y. Okorocho, M. Stiles, C. Kodl, C. Chadha

University of Minnesota, Phalen Village Clinic, St. Paul, Minn: KA. Peterson, L.A. Seaquist, C. Boese, T.J. Mendenhall, A.M. Peterson, A. Rudelt, T.M. Schrock

Riverside Health Partners Clinic, Department of Endocrinology, Minneapolis, Minn: J.M. Sperl-Hillen, P.J. O'Connor, M.E. Busch, A. Chung, B.K. Klein, N. Krugen, T. Bunkers-Lawson, H.L. Ekstrom, H.S. Gunderson, B.M. Johnson, J.H. MacIndoe, D.J. Prewedo, J.L. Rawl, C.M. Roethke, Mary Quinlan, C.R. Fox, B.M. Bate, Q.T. Cao, M.M. Ohnstad, P.J. Meyers

University of Iowa, Health Care Diabetes Clinical Research and Programs, Iowa City, Iowa: W.I. Sivitz, S.M. Wayson, T.A. Lower, K.A. Ochs, D. Wells

#### **Northeastern Clinical Center Networks**

Columbia University College of Physicians and Surgeons, New York, NY: K. Slane, C.R. Lopez-Jimenez

MIND: K. Slane, C.R. Lopez-Jimenez, J. Hirsch, T. Brown

MIND MR imaging: Columbia University Medical Center, New York, NY: J. Hirsch, T.R. Brown, S.M. Dashnaw, J. Cruz-Lobo

### **Northeastern Clinical Sites**

Jacobi Medical Center, Bronx, NY: U.K. Schubart, J. Russo, N. Vincenty, K. Ibarando

Albert Einstein General Clinical Research Center, Bronx, NY: M.H. Alderman, L. Carroll, M.J. Sanguily, A.C. Mayer, L. Ramos

Cornell Internal Medicine Associates, New York, NY: D. Brillon, J. Cordero, R. Chiong, K. Hyams, C. Charles

The Cooper Health System, Cherry Hill, NJ: A. Bastien, S. Grudzinski, P. Niblack, L. Abreu, K. Brown, M. Casale, D. Dougherty, D. Linneman, M.A. Salvador, P. Zee, D. Hyman, D. Atabek, J. Miranda, I. Kumar, C. Baker

Great Lakes Medical Clinic Research, Westfield, NY: D.F. Brautigam, R. Fischer, D.M. Scharf, E. Brautigam, B. Nunn, J.M. Chiarot, C. Flanders

Naomi Berrie Diabetes Center, New York, NY: R. Goland, P. Kringas, J. Montes, J. Belle

Ambulatory Care Network at Columbia University, New York, NY: A. Getaneh, J. Ramirez, G. Kranwinkel, E. Vasquez

Irving Diabetes Research Unit, New York, NY: D.S. Donovan, G. Febres, C. Hernandez, M.A. Jonaitis, C. Lopez-Jimenez

State University of New York Downstate Medical Center, Brooklyn, NY: M.A. Banerji, M. Norton, P. Patel, S. Hirsch

Kings County, Brooklyn, NY: M.A. Banerji, M. Norton, P. Patel, S. Hirsch

### **Ohio-Michigan Clinical Center Networks**

Case Western Reserve University, Division of Clinical and Molecular Endocrinology, Cleveland, Ohio: S. Genuth, F. Ismail-Beigi, M. Thibonnier, L. Vargo, C. Kelly, T. Bongorno, A. Dolish, L. Pavlik, M. Tiktin, S. Isteitieh, A. Bartlett, K. Yee, T. Kulow

MIND: K. Horowitz, L. Pavlik, A. Dolish, M. Tiktin

MIND MR imaging:

University Hospitals of Cleveland, Department of Radiology, Cleveland, Ohio: J. Sunshine, M. Clampitt

### **Ohio-Michigan Clinical Sites**

University Hospitals of Cleveland, Division of Endocrinology, and University Hospitals Westlake Medical, Cleveland, Ohio: F. Ismail-Beigi, A. Krikorian, L. Moore, L. Richardson, E. Coles-Herman, J. Frankino, A. Sood, L. Hustak, M. Julius, L. Pavlik, T. Ross, L. Long, M.K.

Sullivan, L. Strauss, K. Behm, F. Eskandari, C. Hall, D. Hayes, S. Isteitieh, Z. Madhun, E. Seeholzer, J. Shina, H. Taylor, A. Schnall

St. Vincent Charity Hospital, Lipid Research Center, Cleveland, Ohio: L.S. Sadler, M. Griffith, A. Hornsby, K. Klyn, E. Ospelt, L. Long, M. DeSmit, P. McCann, N.P. Schmidt, T. Kulow, J. Zaletal

University Suburban Health Center, South Euclid, Ohio: A.M. Schnall, L. Dragmen, R. Ellert, J. Smith, J. Leksan, T. Sussman

Cleveland Veterans Affairs Medical Center, Department of Medicine, and Ravenna Community Based Outpatient Clinic, Cleveland, Ohio: F. Ismail-Beigi, L. Hustak, M. Julius, W. Schwing, C. Hall, S. Isteitieh, C. Johnson, E. Kern, M.A. Richmond, L. Richardson, K. Roberts, J. Shina, P. Suhan, H. Taylor, S. Watts, J. Martin, G.J. Strauss

Medical University of Ohio, Department of Medicine, Ruppert Health Center, Toledo, Ohio: B. Akpunonu, R. Franco-Saenz, J. Gilmore, M. Gilmore, P. Ross, B. Bauer, R. Pop-Busui, J. Roman, Z. Blust

Henry Ford Health System–New Center One, Detroit, Mich: A.Thomas, D.M. Kahkonen, T. Cushman, M. Roman, A.M. Stys, K. White, M. Austin, C. Chatterton, J.K. Francis, C. Jones, D. Kruger, A. McLellan, F. Whitehouse, E. Higgins, S. Levy, A. Schoenherr

### **Southeastern Clinical Center Networks**

Wake Forest University School of Medicine, Department of Public Health Sciences, Winston-Salem, NC: D.C. Goff, Jr, J.H. Summerson, L. Crago, C.S. Blackwell, A. Bertoni, R.L. Blaine, J.K. Kirk, R.L. Spach, J. Calles, J. Katula, D.B. Wishnietsky, N. Woolard, S. Mayer, L. Gordineer

MIND: N. Woolard, Jingzhong Ding

MIND MR imaging: Wake Forest University School of Medicine, Center for Biomolecular Imaging, Winston-Salem, NC: S. Kaminsky, D. Fuller

### **Southeastern Clinical Sites**

Duke University Medical Center, Durham, NC: M.N. Feinglos, J. Jones, G. Gedon-Lipscomb

Wake Forest University School of Medicine, Department of Geriatrics/Gerontology, Winston-Salem, NC: H.H. Atkinson, J. Stanfield, T. Delvalle-Fagan

Downtown Health Plaza, Winston-Salem, NC: C.F. Pedley, S. Mauney

University of North Carolina, Diabetes Care Center, Chapel Hill, NC: J.B. Buse, M.D. Duclos, R.E. Kirby, A. Goley, K. Vukojcic

Holston Medical Group, Kingsport, Tenn: J.L. Miller, W. Besterman, S.M. Norton, M. Surgener

Carolinas Medical Center Family Practice, Charlotte, NC: M. Dulin, T. Barringer, C. Morris, S. Norton

Robeson Health Care Corporation, Fairmont Clinic, Fairmont, NC: R. Peace, D.O. Stuart, J. Strickland, L. Cummings, J. Stanfield

Robeson Health Care Corporation, Julian T. Pierce Clinic, Pembroke, NC: R. Peace, J. Strickland, L. Cummings, J. Stanfield

Wake Forest University School of Medicine, Departments of Internal Medicine and Endocrinology, Winston-Salem, NC: J.R. Crouse, J. Ellis

Tulane University Health Science Center, New Orleans, La: V. Fonseca, J. John-Kalarickal, S.M. Leger, K. Munshi

Kaiser Permanente, Crescent Medical Center, Tucker, Ga: J. Barzilay, K. Bader, M. Elay
